# Supplementary material for: Probing TDP-43 condensation using an in silico designed aptamer
Source: PubMed Central journal article supplement (PMC9226187; doi:10.1038/s41467-022-30944-x), 2022-06-23
Supplement: 41467_2022_30944_MOESM1_ESM.pdf [file 41467_2022_30944_MOESM1_ESM.pdf]

# Supplementary information

## Probing TDP-43 condensation using an in silico designed aptamer

Elsa Zacco<sup>1,#</sup>, Owen Kantelberg<sup>2,#</sup>, Edoardo Milanetti<sup>3,4</sup>, Alexandros Armaos<sup>1</sup>,  
Francesco Paolo Panei<sup>3</sup>, Jenna Gregory<sup>5,6,7</sup>, Kiani Jeacock<sup>2</sup>, David J. Clarke<sup>2</sup>,  
Siddharthan Chandran<sup>5,6,7</sup>, Giancarlo Ruocco<sup>3,4</sup>, Stefano Gustincich<sup>1</sup>,  
Mathew H. Horrocks<sup>2,\*</sup>, Annalisa Pastore<sup>8,\*</sup> and Gian Gaetano Tartaglia<sup>1,9,10,11,\*</sup>

<sup>1</sup> Centre for Human Technologies (CHT), Istituto Italiano di Tecnologia (IIT), Via Enrico Melen, 83, 16152 Genova, Italy;

<sup>2</sup> EaStCHEM School of Chemistry, University of Edinburgh, Edinburgh EH9 3FJ, United Kingdom;

<sup>3</sup> Department of Physics, Sapienza University, Piazzale Aldo Moro 5, 00185 Rome, Italy

<sup>4</sup> Center for Life Nanoscience, Istituto Italiano di Tecnologia, Viale Regina Elena 291, 00161 Rome, Italy

<sup>5</sup> UK Dementia Research Institute at University of Edinburgh, University of Edinburgh, Edinburgh bioQuarter, Chancellor's Building, 49 Little F

<sup>6</sup> Centre for Clinical Brain Sciences, University of Edinburgh, Edinburgh, UK

<sup>7</sup> Euan MacDonald Centre for MND Research, University of Edinburgh, Edinburgh, UK

<sup>8</sup> UK Dementia Research Institute at the Maurice Wohl Institute of King's College London, London SE5 9RT, UK

<sup>9</sup> Centre for Genomic Regulation (CRG), Dr. Aiguader 88, 08003, Barcelona, Spain;

<sup>10</sup> Catalan Institution for Research and Advanced Studies, ICREA, Passeig Lluís Companys 23 08010 Barcelona, Spain;

<sup>11</sup> Department of Biology 'Charles Darwin', Sapienza University of Rome, P.le A. Moro 5, Rome 00185, Italy

#Equal contribution

\*correspondence to: [mathew.horrocks@ed.ac.uk](mailto:mathew.horrocks@ed.ac.uk); [annalisa.pastore@crick.ac.uk](mailto:annalisa.pastore@crick.ac.uk); [gian.tartaglia@iit.it](mailto:gian.tartaglia@iit.it)

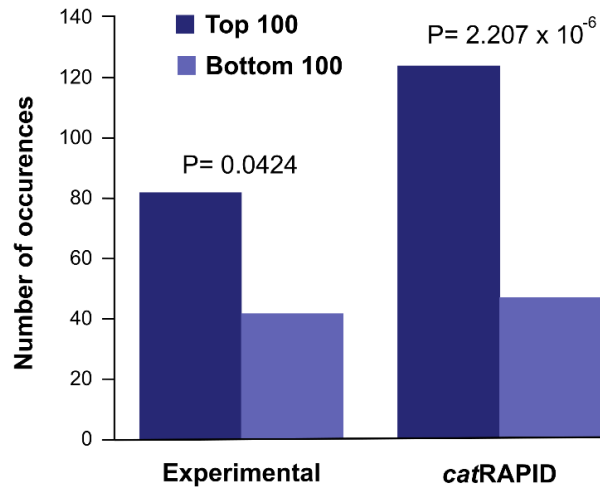

**Supplementary Figure S1.** We found a significant increase in the number of GU repeats in experimental CLIP-seq data (p-value  $4 \times 10^{-2}$ , Wilcoxon signed-ranked test, one sided). Stronger enrichment was found when ordering transcriptomic regions according to the *catRAPID* score (p-value  $2 \times 10^{-6}$ , Wilcoxon signed-ranked test, one sided), thus suggesting enrichment of potential TDP-43 targets. Source data are provided as a Source Data file.

|             |             |            |             |            |            |
|-------------|-------------|------------|-------------|------------|------------|
| AAGUGAUGAA  | CAGAAGUGAU  | CGGCCACUGA | GCAGAGAGGG  | GGCGGCCACG | UAUCGAGGCG |
| AAUGUGCACC  | CAGAGAGGGU  | CGGCGCUCAG | GCAGCCAUCC  | GGCGCGGGCC | UCAGAAGUGA |
| AAUUGAUCAG  | CAGAUAGACG  | CGGCGGCCAC | GCAGCGAGGC  | GGCUGGGGUG | UCAGAUAGAC |
| AAUUGAUCAG  | CAGAUAGACG  | CGGGCUUGUC | GCACCCUUGG  | GGCUUGUCCC | UCAGAUAGAC |
| ACCCUUGGGU  | CAGCCAUCCA  | CGGGCUUGUC | GCAGAGAGGG  | GGCGCUCAGA | UCCCCGAGGU |
| ACGAGGCCGG  | CAGCGAGGCC  | CGGGCCCCGG | GCAGCCAUCC  | GGCGGAUCGG | UCCCCGGCCA |
| ACGAGGCCGG  | CAUCCAGCUG  | CGGUGUUGCU | GCAGCGAGGC  | GGCGGCCACG | UCCCCGGCCA |
| ACGCUGUGGU  | CCACGCUGUG  | CUCAGAAGUG | GCCACGCUGU  | GGCGCGGGCC | UCCCCGUGAG |
| ACUGAUUAUC  | CCACUGAUUA  | CUGAGGCUGG | GCCACUGAUU  | GGCUGGGGUG | UCCCCGAGCU |
| AGAAGUGAUG  | CCAUCCAGCU  | CUGAUUAUCG | GCCAUCCAGC  | GGCUUGUCCC | UCGAGGCGAU |
| AGACGAGGCC  | CCCCGAGGUC  | CUGCAGAGAG | GCCCCUAGG   | GGCUUGUCCC | UCGGUGUUGC |
| AGACGAGGCC  | CCCCGGCCAC  | CUGCAGCCAU | GCCCGGCGCU  | GGGAGUGAAU | UGAAUUGCA  |
| AGAGAGGGUG  | CCCCGGCCAC  | CUGCAGGGCC | GCCUCGCGGG  | GGGCCCGGCG | UGAAUUGAUC |
| AGAGGGUGGG  | CCCCUAGGCC  | CUGGCCUUGC | GCCGGGCUUG  | GGGCCUGCAG | UGAAUUGAUC |
| AGAUAGACGA  | CCCGAGGUCC  | CUGGGGUGGG | GCCGGGCUUG  | GGGCGGAUCG | UGAGGCUGGG |
| AGAUAGACGA  | CCCGCUGAGG  | CUGUGGUCCC | GCCUCGAGAG  | GGGCUUGUCC | UGAUCAGAU  |
| AGCCAUCCAG  | CCCCGAGCUG  | CUUAGGCGGC | GCCUCGAGCC  | GGGCUUGUCC | UGAUCAGAU  |
| AGCGAGGCC   | CCCCGGCCACU | CUUGCCUGCA | GCCAGGCCCC  | GGGAGUGAA  | UGAUGAAUUG |
| AGCUGGCCCU  | CCCCGCGCUC  | CUUGGGUGGG | GCGAUUCUGA  | GGGGCCCGGC | UGAUUAUCGA |
| AGGCCCCUUA  | CCCUGCGGGG  | CUUGUCCCCG | GCGCUCAGAA  | GGGGCGGAUC | UGCACCCUUG |
| AGGCCGGGCU  | CCCUUAGGGC  | CUUGUCCCCG | GCGGAUCGGU  | GGGGUGGGGC | UGCAGAGAGG |
| AGGCCGGGCU  | CCCUUGGGUG  | GAAGUGAUGA | GCGGCCACGC  | GGGUGGGCCU | UGCAGCCAUC |
| AGGCCGAUUCU | CCGAGGUCCC  | GAAUGUGCAC | GCGGCGGCCA  | GGGUGGGGAG | UGCUCGAGA  |
| AGGCCGGCGC  | CCGCUAGAGC  | GAAUUGAUC  | GCGGGGCCCG  | GGGUGGGGCG | UGCAGGGGCC |
| AGGCUGGGGU  | CCGGAGCUGG  | GAAUUGAUC  | GCUCAGAAGU  | GGUCCCCGAG | UGCUCGAGG  |
| AGGGUGGGGA  | CCGGCCACUG  | GACGAGGCCG | GCUCAGGCUG  | GGUCCCCGAG | UGGCCUUGCG |
| AGGUCCCAGA  | CCGGCGCUCA  | GACGAGGCCG | GCUGGCCUUG  | GGUGGGCCUG | UGGCCUUGCA |
| AGUGAAUGUG  | CCGGGCUUGU  | GAGAGGGUGG | GCUGGGGUGG  | GGUGGGGAGU | UGGGGAGUGA |
| AGUGAUGAAU  | CCGGGCUUGU  | GAGCUGGCC  | GCUCUGGUCC  | GGUGGGGCGG | UGGGGCGGAU |
| AUAGACGAGG  | CCUGCAGAGA  | GAGGCCCCUU | GCUCUGCCUG  | GGUGUUGCUU | UGGGGUGGGG |
| AUAGACGAGG  | CCUGCAGCCA  | GAGGCCGGGC | GCUUGUCCCC  | GUCCCCGAGG | UGGGUGGGCC |
| AUCAGAUAGA  | CCUGCGGGGC  | GAGGCCGGGC | GCUUGUCCCC  | GUCCCCGACC | UGUCCCCGA  |
| AUCAGAUAGA  | CCUUAAGCGG  | GAGGCGAUUC | GGAGCUGGCC  | GUCCCCGGCC | UGUCCCCGGC |
| AUCCAGCUGA  | CCUUGGGUGG  | GAGGCUGGGG | GGAGUGAAUG  | GUCCCCGAGC | UGUCCCCGGC |
| AUCGAGGCCA  | CGAGGCCCCU  | GAGGGUGGGG | GGAUCGGUGU  | GUGAAUGUGC | UGUGCACCCU |
| AUCGGUGUUG  | CGAGGCCGGG  | GAGGUCCCCG | GGCCACGCUG  | GUGAUGAAU  | UGUGGUCCCC |
| AUGAAUUGAU  | CGAGGCCGGG  | GAGUGAAUGU | GGCCACUGAU  | GUGCACCCUU | UGUUGCUUGC |
| AUGAAUUGAU  | CGAGGCGAAU  | GAUAGACGAG | GCCCCUAG    | GUGGGCCUUG | UAGGCGCGC  |
| AUGUGCACCC  | CGAGGUCCCC  | GAUAGACGAG | GGCCCGGCGC  | GUGGGGAGUG | UUAUCGAGGC |
| AUUUUCGAGG  | CGAUUCUGAU  | GAUCAGAUAG | GGCCUUGCGG  | GUGGGGCGGA | UUCCCCGUGA |
| AUUCUGAUCU  | CGCUCAGAAG  | GAUCAGAUAG | GGCCGGGCUU  | GUGGUCCCCG | UUGAUCAGAU |
| AUUGAUCAGA  | CGCUGAGGCU  | GAUCGGUGUU | GGCCGGGCUU  | GUGUUGCUUG | UUGAUCAGAU |
| AUUGAUCAGA  | CGCUGUGGUC  | GAUGAAUUGA | GGCCUUGCAGC | GUUGCUUGCC | UUGCCUGCAG |
| CACCCUUGGG  | CGGAGCUGGC  | GAUUAUCGAG | GCCGAUUCUG  | UAGACGAGGC | UUGCUUGCCU |
| CACGCUGUGG  | CGGAUCGGUG  | GAUUCUGAUC | GGCGCUCAGA  | UAGACGAGGC | UUGGUGGGC  |
| CACUGAUUAU  | CGGCCACGCU  | GCACCCUUGG | GGCGGAUCGG  | UAGGCGGGCG | UUGUCCCCGG |
|             |             |            |             |            | UUGUCCCCGG |

---

**Supplementary Table S1.** Candidate aptamers undergoing RNA and Protein Fitness scoring.

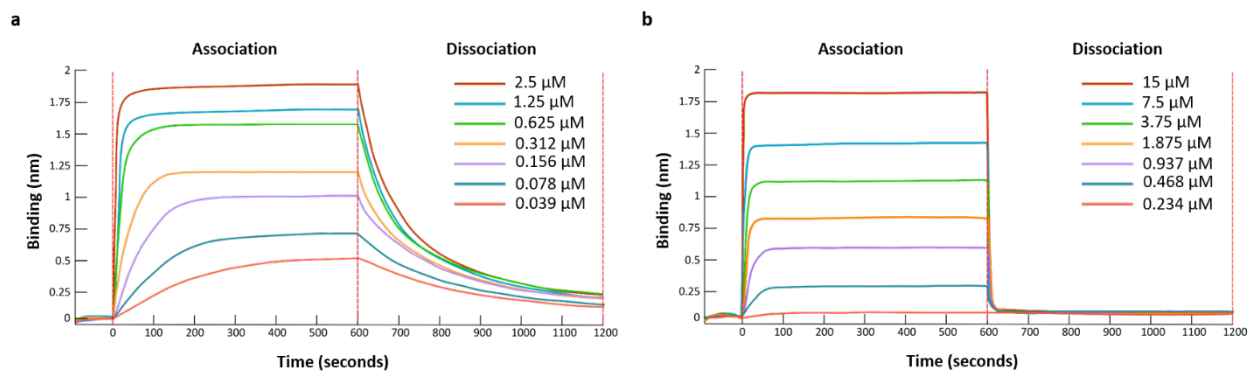

**Supplementary Figure S2. Example of binding curves of RRM1-2 with the aptamers.** The sensorgrams show the association and dissociation steps resulting from a bio-layer interferometry experiments performed with RRM1-2 and Apt-1 (a) or nApt-1 (b). Each curve indicates binding response as nm shift given by different protein concentrations, which range between 2.5  $\mu\text{M}$  and 0.039  $\mu\text{M}$  for Apt-1 and between 15  $\mu\text{M}$  and 0.234  $\mu\text{M}$  for nApt-1. Source data are provided as a Source Data file.

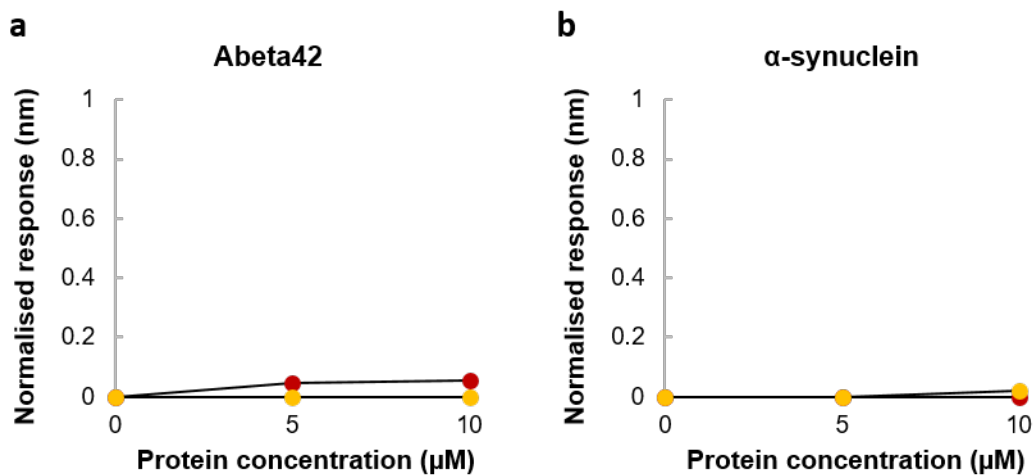

**Supplementary Figure S3. Biolayer interferometry investigation of the binding between the aptamers and control amyloidogenic proteins. a)** Binding curves for Abeta42; **b)** Binding curves for  $\alpha$ -synuclein, red: Apt-1; yellow: nApt-1. At the highest tested concentration of 10  $\mu\text{M}$  no binding was observed for either protein.

|                            | <b>Apt-1 and nApt-1 systems</b> |
|----------------------------|---------------------------------|
| Simulation time step       | 2 femtoseconds                  |
| Acquisition time step      | 100 picoseconds                 |
| algorithm of integration   | Leap-frog                       |
| MD software                | GROMACS                         |
| Force field                | AMBER99                         |
| Total time                 | 1 $\mu$ second*                 |
| Reference Temperature      | 300K                            |
| Temperature coupling       | modified Berendsen              |
| Reference Pressure         | 1 bar                           |
| Pressure coupling          | Parinello-Rahman                |
| box size                   | 1 nm distance from structure    |
| constraint - algorithm     | LINCS                           |
| RMSD fitting reference     | Protein + RNA                   |
| RMSD calculation reference | Protein + RNA                   |

|                           | <b>Apt-1</b> | <b>nApt-1</b> |
|---------------------------|--------------|---------------|
| Total number of atoms     | 104808       | 72955         |
| Number of water molecules | 33902        | 23282         |

\* The time is increased by steps of 1  $\mu$ second in the case the MD simulation is not converged in at least the 60% fraction of the last microsecond.

**Supplementary Table S2. Top:** Parameters defined for the Molecular Dynamics of Apt-1 and nApt-1 with RRM1-2; **Bottom:** Atom counts.

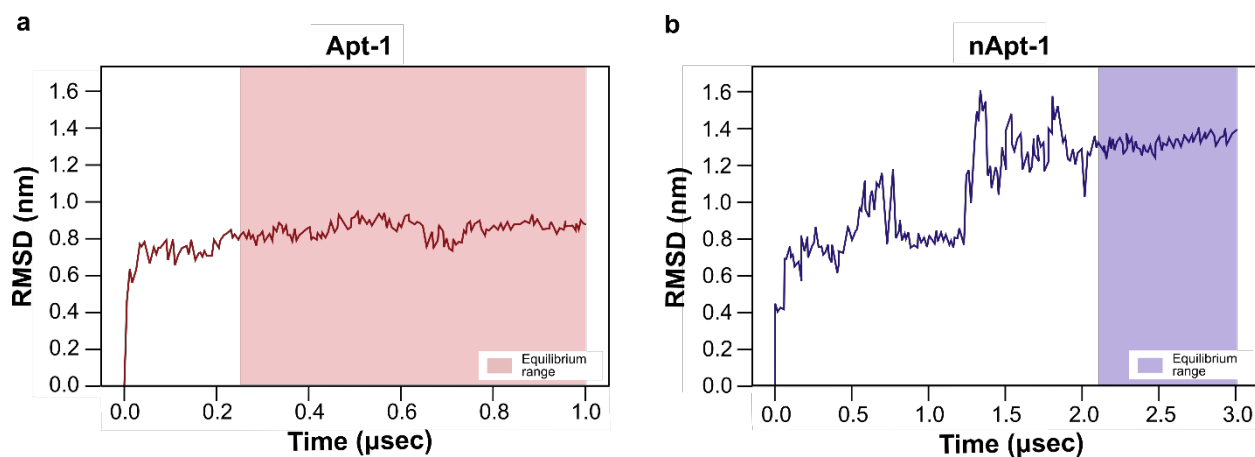

**Supplementary Figure S4.** MD trajectories were run in explicit solvent. Simulations were carried out setting the system temperature to 300 K. The equilibrium conditions were evaluated based on the Root Mean Square Deviation (RMSD). Starting from 1  $\mu\text{sec}$ , we prolonged the simulation of 1  $\mu\text{sec}$  to confirm that the RMSD had only negligible fluctuations ( $<1 \text{ \AA}$ ) in at least the 60% of the trajectory.

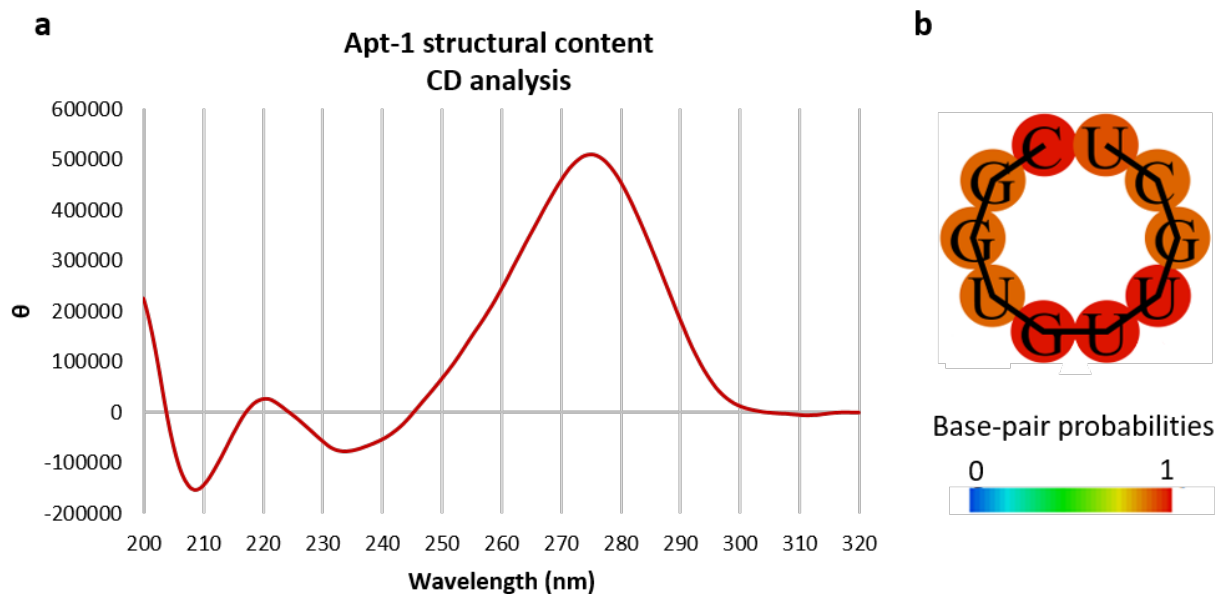

**Supplementary Figure S5. Structural analysis of Apt-1.** **a)** Circular dichroism analysis of the aptamer Apt-1, in which the spectrum displays the typical maxima and minima of an RNA sequence without any noteworthy secondary structure; **b)** Prediction of the structure of Apt-1 by means of the algorithm “RNAfold”, showing very poor base-pair probabilities and emphasizing the linear nature of the sequence.



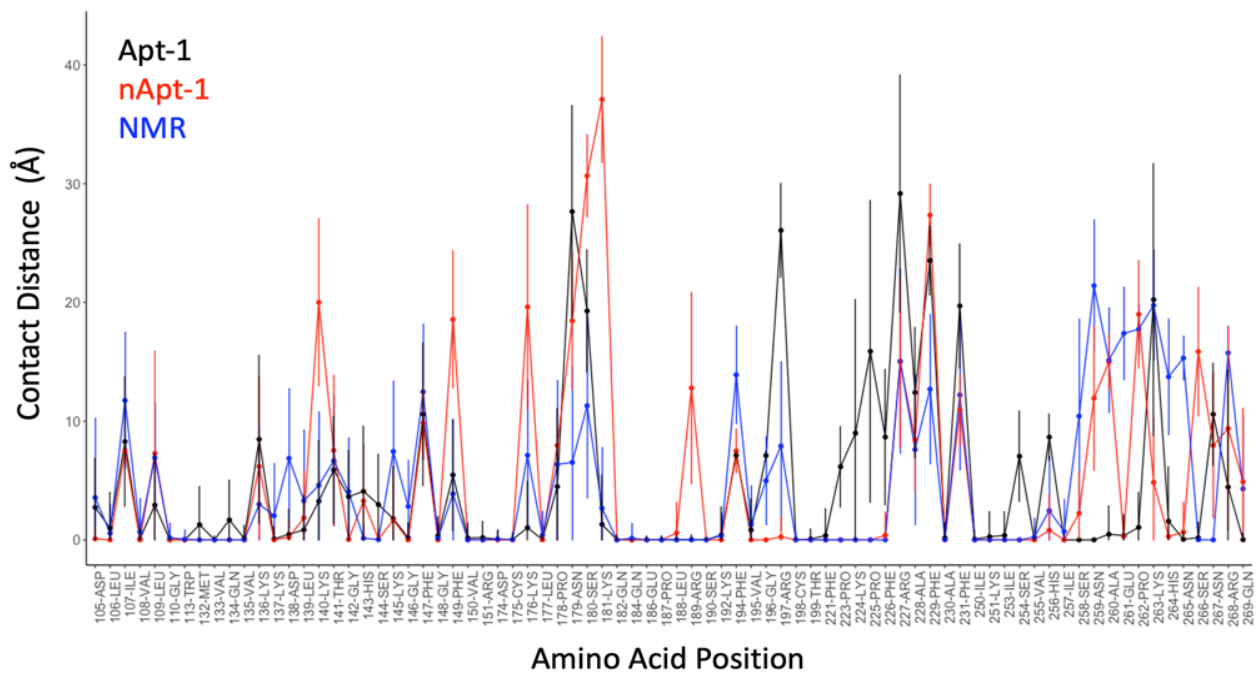

**Supplementary Figure S6.** Contacts of the RRM1-2 binding site with Apt-1, nApt-1 and NMR structures. Average and standard deviation of the distances are derived considering the simulation at equilibrium (Supplementary Figure S4).

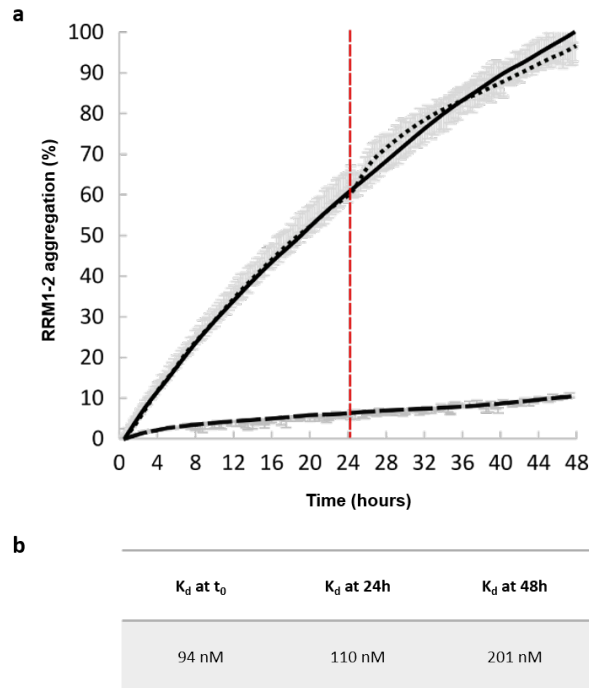

**Supplementary Figure S7. Aggregation of RRM1-2 in the presence and absence of Apt-1 and binding affinities at different time points. a) Continuous line:** RRM1-2 by itself; **long-dashed line:** RRM1-2 with Apt-1 co-incubated with the protein since  $t_0$ ; **short-dashed line:** RRM1-2 with Apt-1 added after 24 hours from the start of the assay (red vertical dashed line indicate the time of addition of Apt-1). Aggregation was measured in triplicates on a 96-well plate by means of the dye Proteostat, blanked with the buffer and normalised by considering the highest value reached after 48 hours to be 100 %. The experiment was repeated three times. **b)  $K_d$**  values reported for the pair RRM1-2—Apt-1 when adding the aptamer at  $t_0$  (column 1), 24 hours (column 2) or 48 hours (column 3) from the start of the aggregation process of RRM1-2. The  $K_d$  was determined with BLI as reported in the “Materials and Methods” section, with the exception that RRM1-2 was left to aggregate at 37 °C under constant dual-orbital shaking. The experiment was performed in triplicate. Source data are provided as a Source Data file.

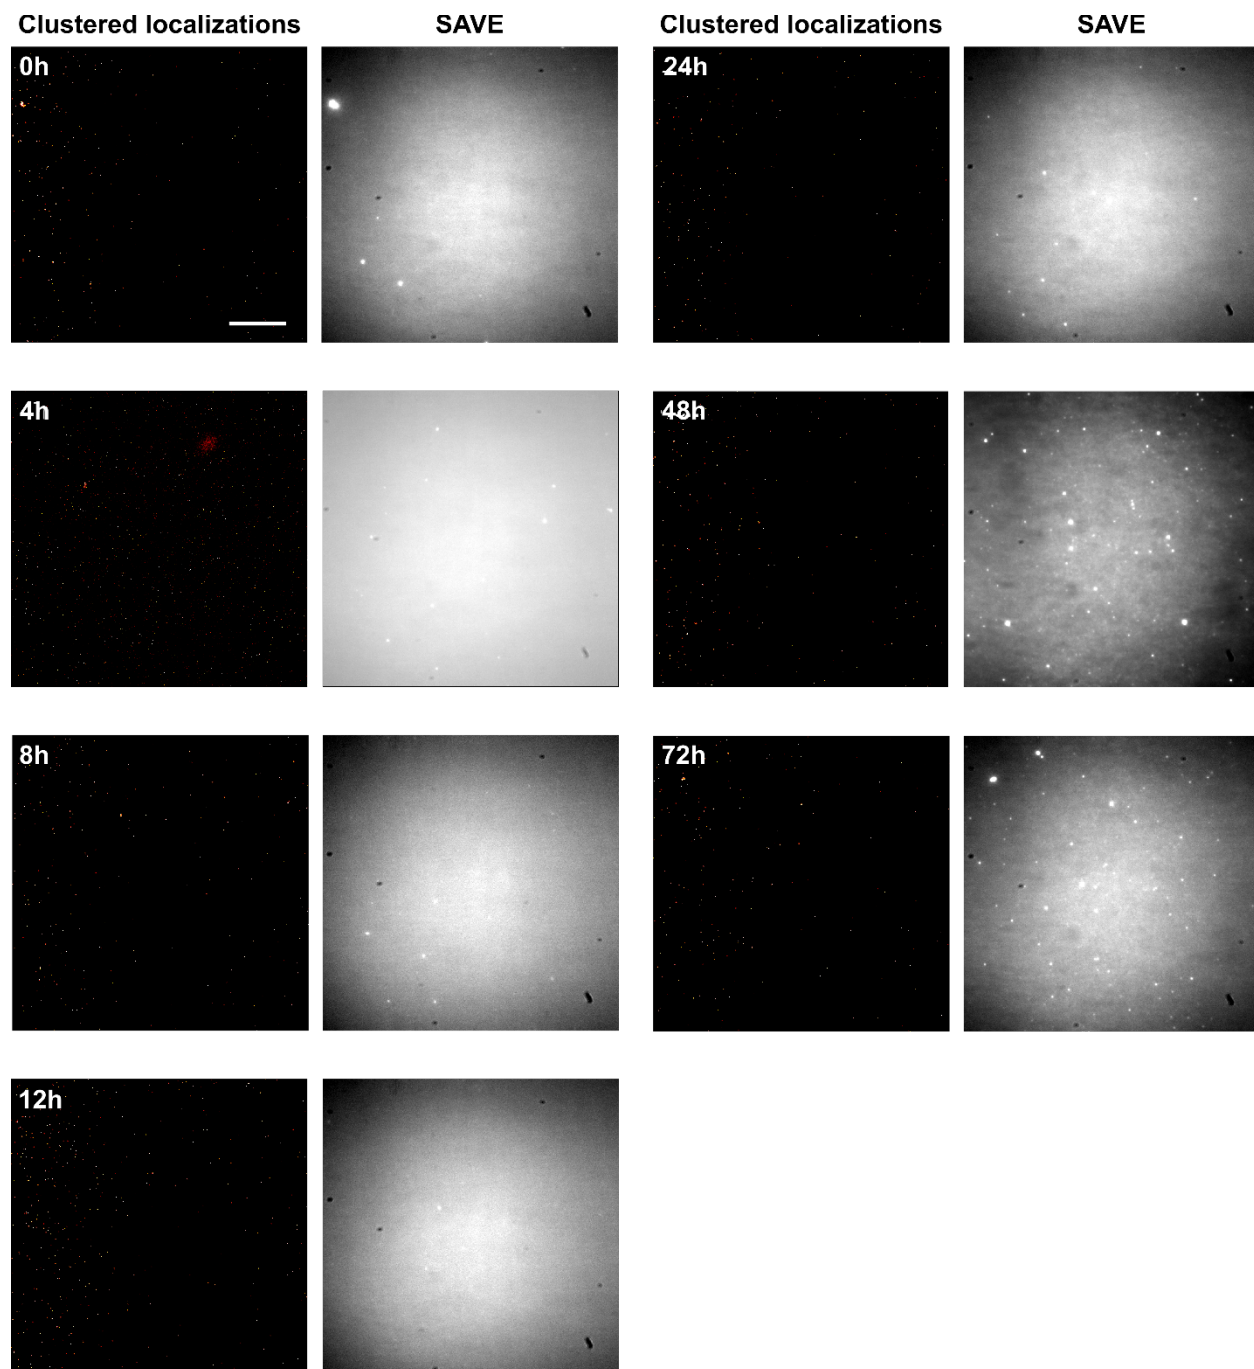

**Supplementary Figure S8: Representative full fields of view at each timepoint.** Clustered localizations (left panels, with time stamps) paired with their corresponding SAVE images (right panels) shown as representative images of the total of 9 fields of view captured for each imaging timepoint (0h, 4h, 8h, 12h, 24h, 48h and 72h). Data from 3 independent experiments. Scale bar 10  $\mu\text{m}$ . Source data are provided as a Source Data file<sup>1</sup>.

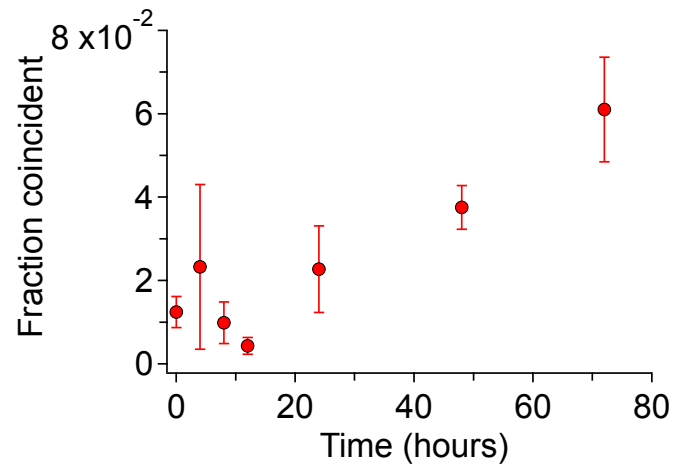

**Supplementary Figure S9: Fraction of aggregates that are ThT-active.** The fraction of aggregates detected using Apt1 that are ThT-active across the time course (mean +/- SD, n =3). Source data are provided as a Source Data file<sup>1</sup>.

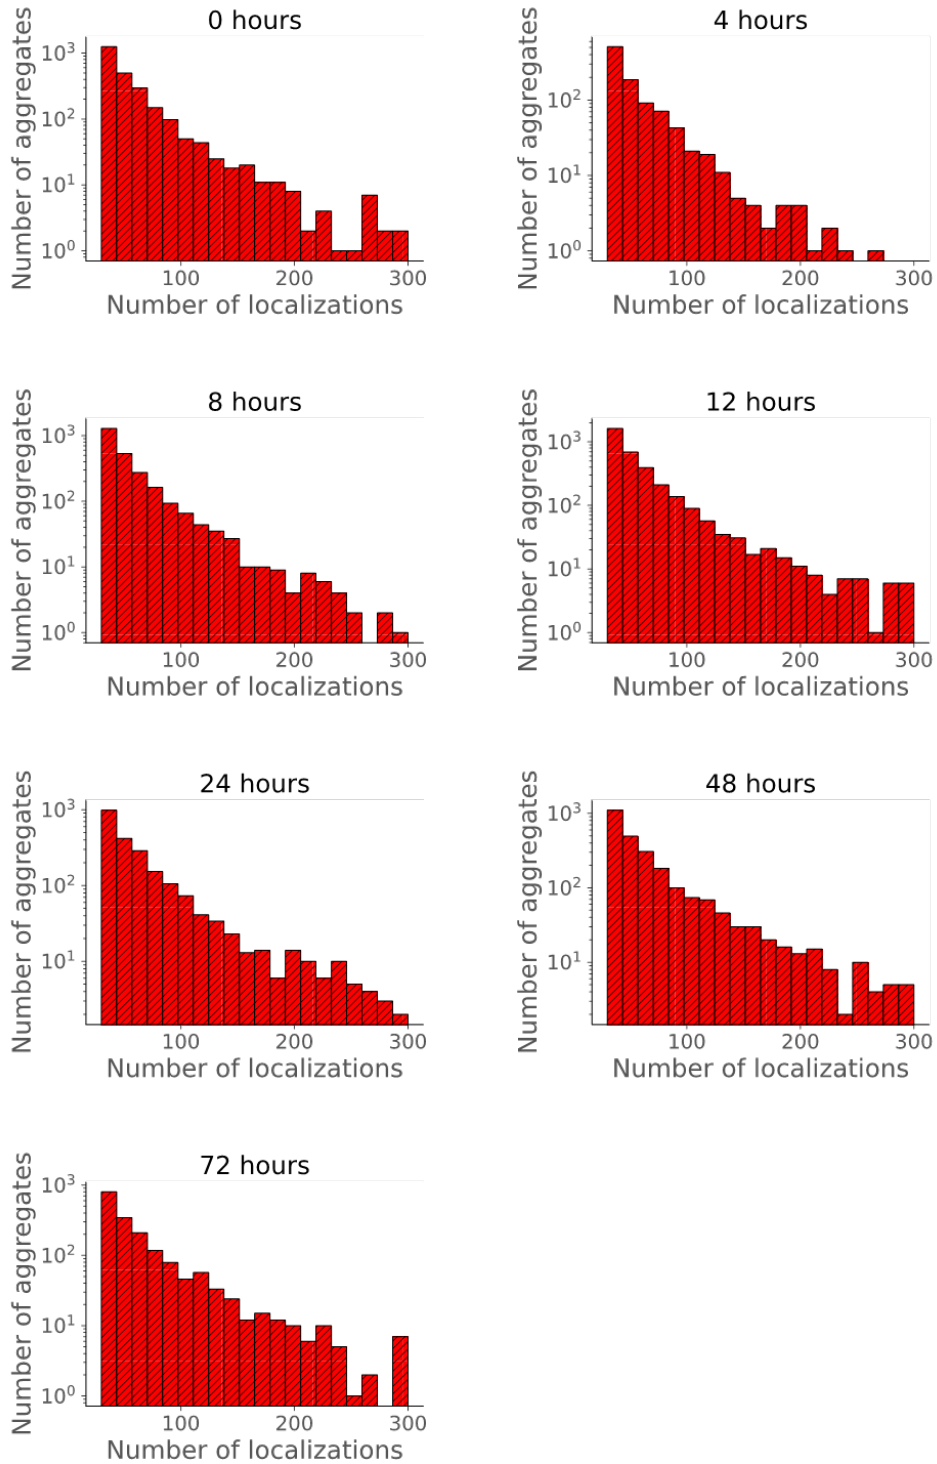

**Supplementary Figure S10. Histograms of the number of localizations for each aggregate.** The number of localizations measured for each of the aggregates detected (across three replica) are presented in the histograms for each time-point. Source data are provided as a Source Data file<sup>1</sup>.

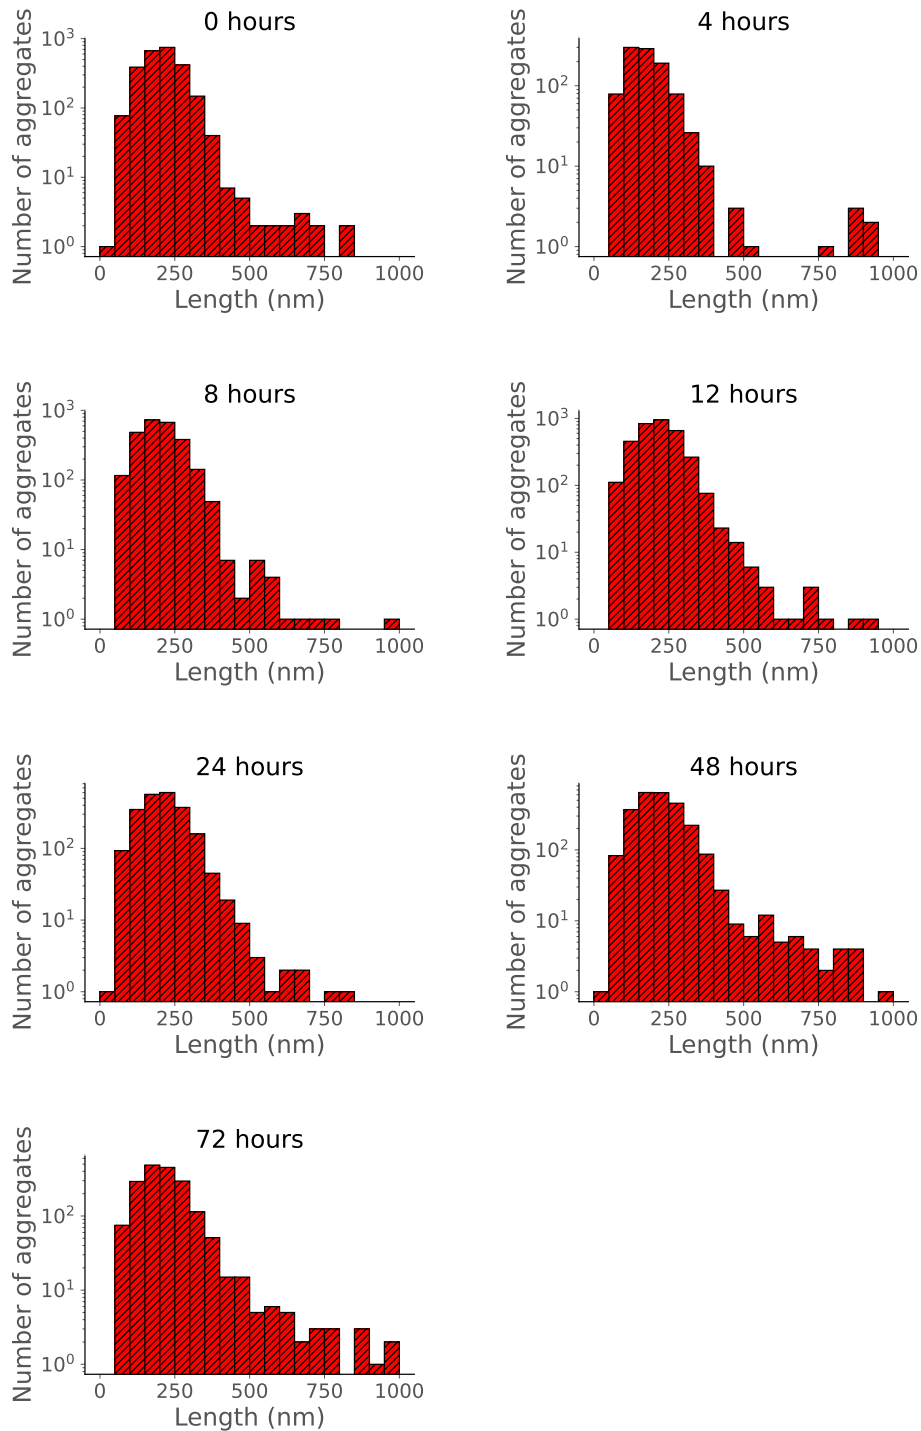

**Supplementary Figure S11.** Histograms of aggregate length. The lengths of all of the aggregates detected (across three replica) are presented in the histograms for each time-point. Source data are provided as a Source Data file<sup>1</sup>.

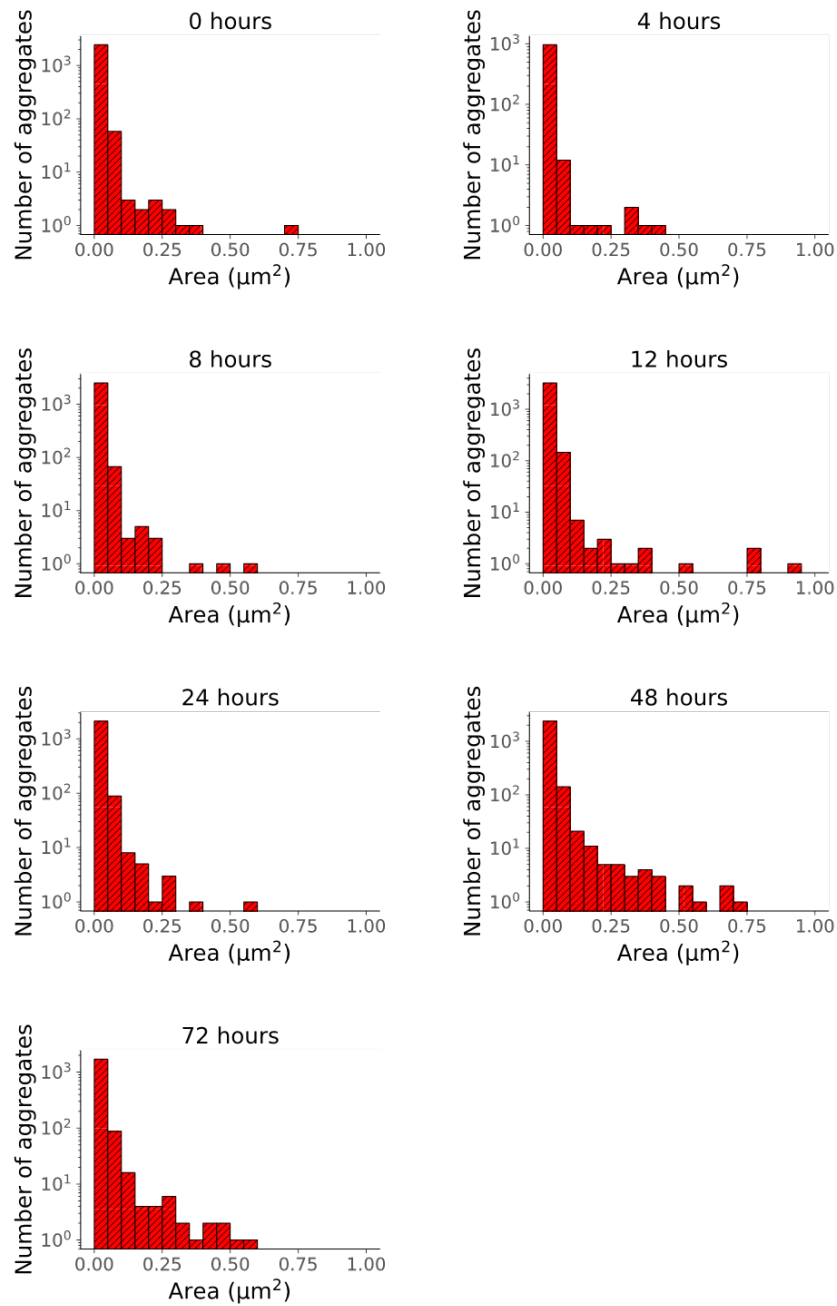

**Supplementary Figure S12. Histograms of areas for each aggregate.** The area that the localizations were projected onto for each of the aggregates detected (across three replica) are presented in the histograms for each time-point. Source data are provided as a Source Data file<sup>1</sup>.

| <b>0 hours</b> | <b>4 hours</b> | <b>8 hours</b> | <b>12 hours</b> | <b>24 hours</b> | <b>48 hours</b> | <b>72 hours</b> |
|----------------|----------------|----------------|-----------------|-----------------|-----------------|-----------------|
| 20.58 nm       | 22.23 nm       | 20.37 nm       | 23.59 nm        | 18.56 nm        | 14.97 nm        | 17.58 nm        |
| 14.69 nm       | 20.48 nm       | 17.59 nm       | 24.46 nm        | 17.38 nm        | 16.11 nm        | 28.07 nm        |
| 14.39 nm       | 15.42 nm       | 21.34 nm       | 19.46 nm        | 24.71 nm        | 9.61 nm         | 17.57 nm        |
| 23.64 nm       | 15.75 nm       | 15.88 nm       | 28.05 nm        | 19.68 nm        | 21.2 nm         | 21.61 nm        |
| 22.39 nm       | 14.61 nm       | 17.71 nm       | 19.48 nm        | 25.11 nm        | 25.22 nm        | 24.23 nm        |
| 23.22 nm       | 18.73 nm       | 17.14 nm       | 19.16 nm        | 26.45 nm        | 20.23 nm        | 17.75 nm        |
| 17.19 nm       | 21.06 nm       | 15.88 nm       | 15.91 nm        | 19.93 nm        | 17.13 nm        | 22.04 nm        |
| 18.4 nm        | 14.71 nm       | 20.1 nm        | 20.34 nm        | 15.09 nm        | 16.61 nm        | 24.35 nm        |
| 20.02 nm       | 19.64 nm       | 18.42 nm       | 19.4 nm         | 18.89 nm        | 19.73 nm        | 23.27 nm        |

**Supplementary Table S3: Calculated resolutions for each image.** The resolution of each image was calculated using the Fourier Ring Correlation plug-in for imageJ, available as part of the GDSCSMLM package.



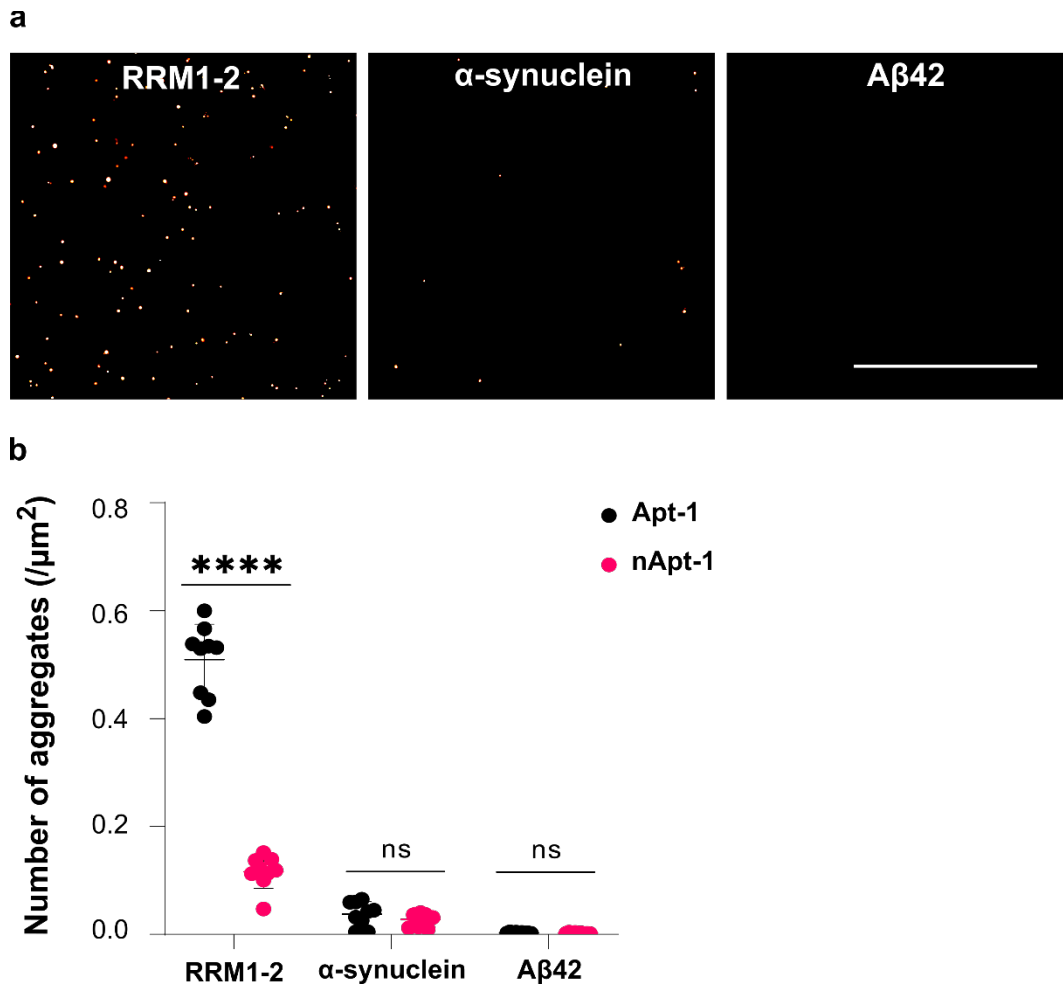

**Supplementary Figure S13: Aggregate detection of TDP-43,  $\alpha$ -synuclein and A $\beta$ 42 with Apt-1 and nApt-1. a)** Sample fields of view of clustered aggregates imaged with Apt-1 for respective proteins. Data from 3 independent experiments. Scale bar is 5  $\mu$ m. **b)** Plot of mean cluster number per  $\mu$ m<sup>2</sup> showing a significant difference in the detection of aggregates with Apt-1 and nApt-1 only for RRM1-2. The data shown are means  $\pm$  SD of 9 fields of view. \*\*\*\* $p$ <0.0001, ns  $p$ >0.05; analyzed by t-test. Source data are provided as a Source Data file<sup>1</sup>.

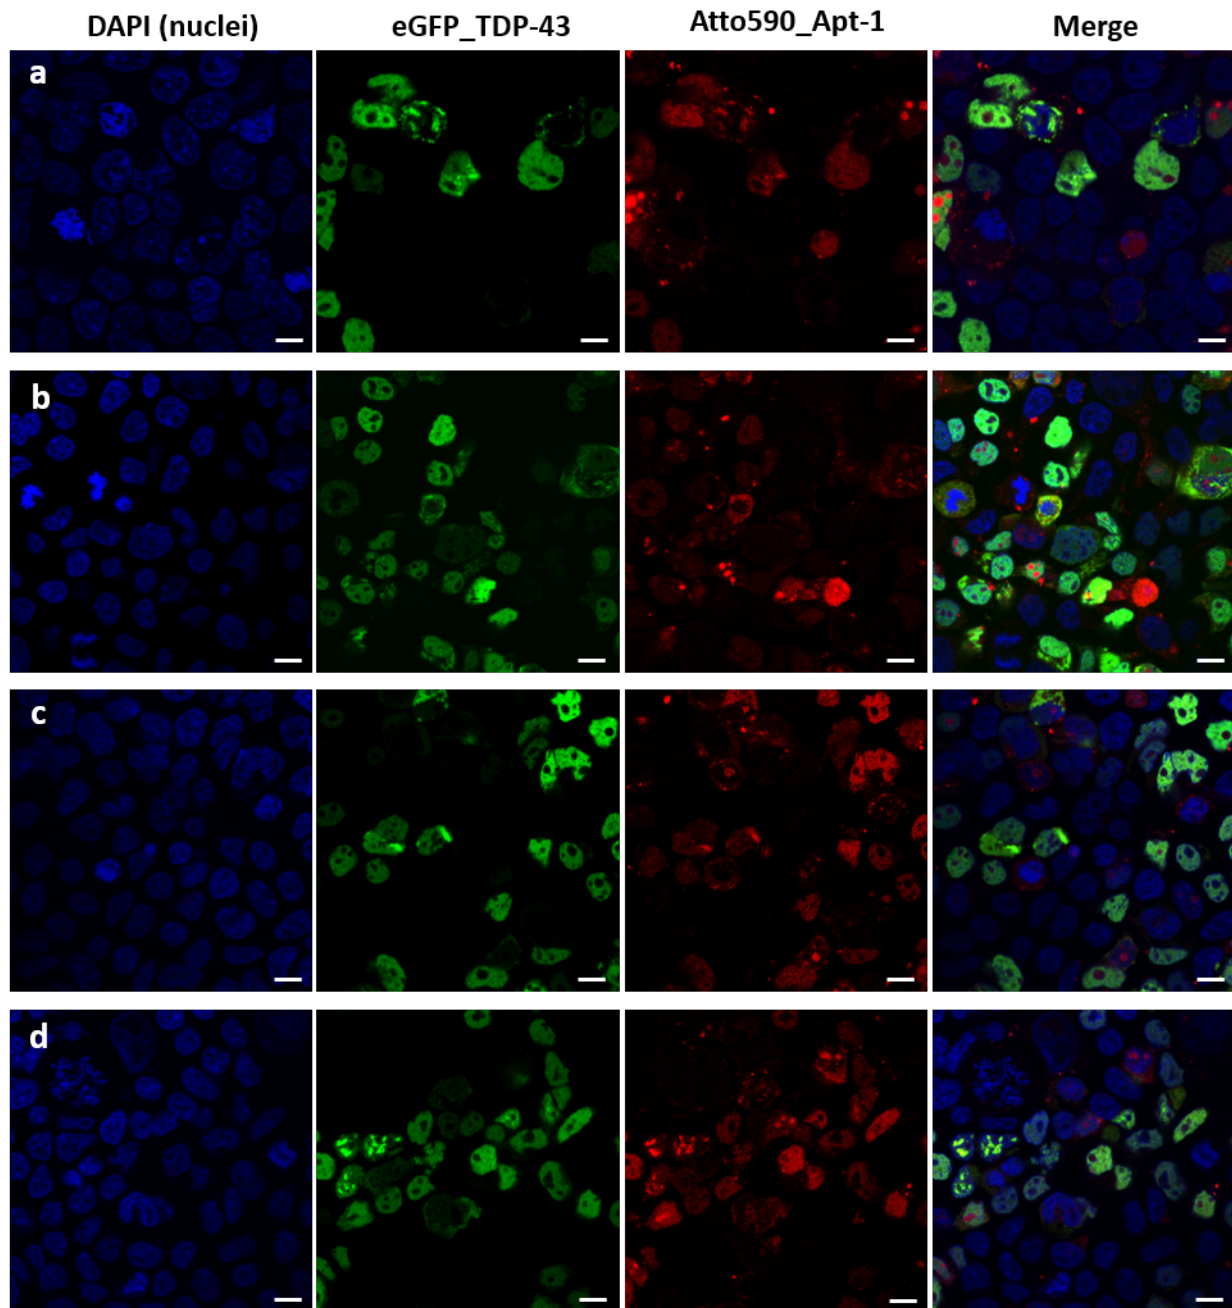

**Supplementary Figure S14: Wide field views of HeK 293T cells overexpressing TDP-43 and Apt-1. a-d)** The figures report examples of the three fluorescence channels (blue, green and red) and the merged images acquired 24 hours after the cells were co-transfected with the plasmid for the overexpression of eGFP\_TDP-43 and Atto590\_Apt-1. The images show similar distribution of the aptamer and its target protein within living cells. Data from three independent experiments, each time in duplicates. Scale bar = 7  $\mu$ m.

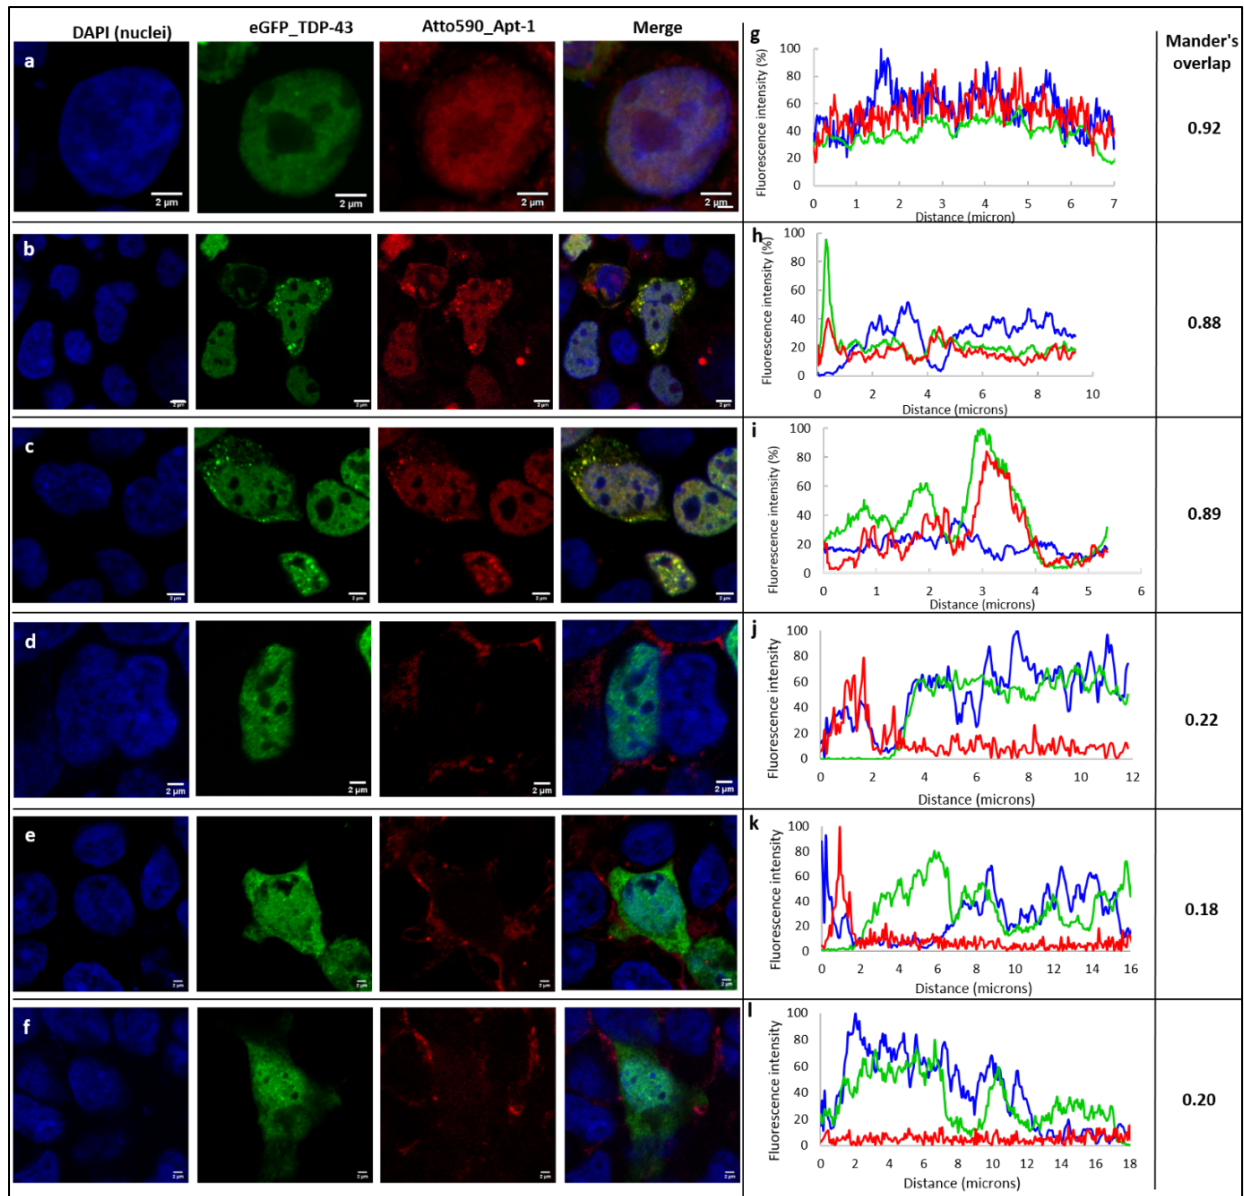

**Supplementary Figure S15. Supplementary Fig. S6: Distribution of TDP-43 and Apt-1 or nApt-1 in living cells. a-c):** Cells co-transfected with eGFP\_TDP-43 and Atto590\_Apt-1 showing overlapping distribution of the two fluorophores; **d-f):** Cells co-transfected with eGFP\_TDP-43 and Atto590\_nApt-1, in which the aptamer does not co-localise with the protein TDP-43; **g-i):** Fluorescence profiles of DAPI, eGFP and Atto590 showing the distribution of the green of TDP-43 and the red of Apt-1 (**g-i**) or nApt-1 (**j-i**), across the correspondent cell on the left; Right hand-side panel: Mander's overlap values relative to the cell displayed on the left. Scale bar = 2  $\mu$ m.

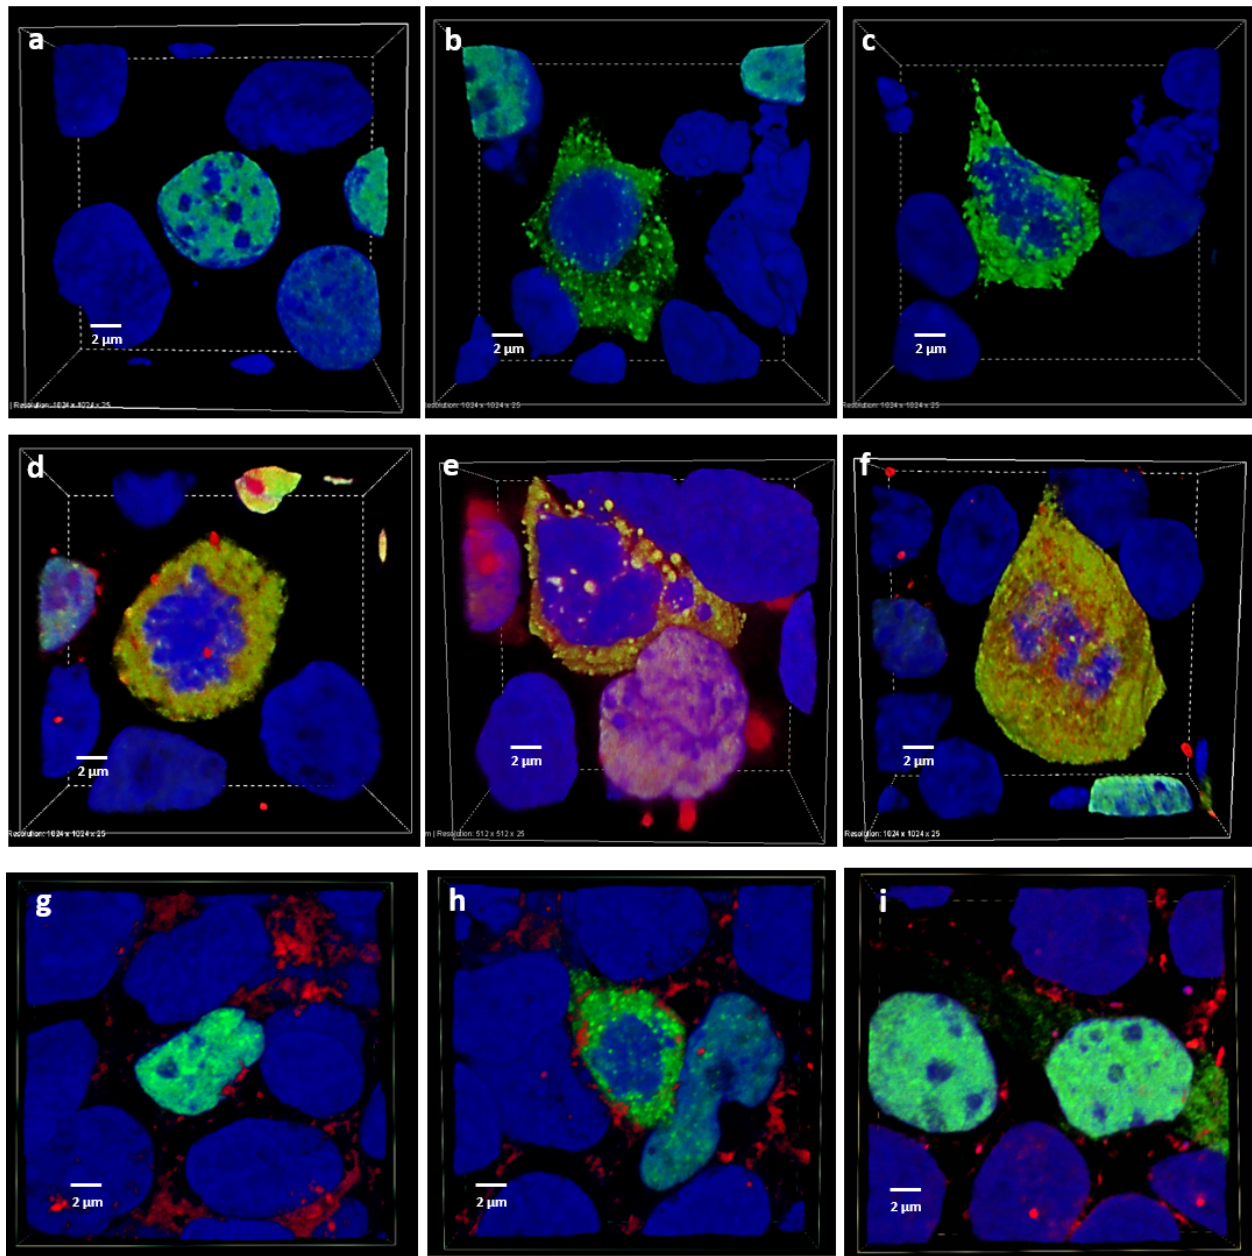

**Supplementary Figure S16. Three-dimensional images of Hek 293T cells overexpressing eGFP\_TDP-43.** The selected examples refer to cells with nuclear TDP-43 distribution (**a**) or cytosolic aggregated TDP-43 (**b-c**), and to cells co-transfected with Atto\_Apt-1 (**d-f**) in which the aptamer overlaps with TDP-43, giving the yellow colour (derived from the green of eGFP\_TDP-43 and the red of Atto\_Apt-1); (**g-i**) show cells co-transfected with eGFP\_TDP-43 and Atto\_nApt-1, in which instead the aptamer does not recognise the target protein. 3D images average size: 20 x 20 x 12.5  $\mu\text{m}$ ; Z: 0.5  $\mu\text{m}$ . Scale bar = 2  $\mu\text{m}$ .

| <b>Aggregate imaging</b>       |                                                |                                                                   |                             |
|--------------------------------|------------------------------------------------|-------------------------------------------------------------------|-----------------------------|
| <b>Name</b>                    | <b>Sequence 5'-3'</b>                          | <b>Modifications</b>                                              | <b>Supplier</b>             |
| Apt-1_ATTO590                  | CGGUGUUGCU_ATTO590                             | 3' ATTO-590 NHS Ester                                             | ATDBio                      |
| Apt-1_ATTO590_2Fluoro-C        | C <sup>F</sup> GGUGUUG <sup>F</sup> CU_ATTO590 | “F” indicates Fluorination of the base.<br>3' ATTO-590 NHS Ester. | ATDBio                      |
| nApt-1_ATTO590_2Fluoro-G       | ATTO590_AG <sup>F</sup> CAACACCG <sup>F</sup>  | “F” indicates Fluorination of the base.<br>5' ATTO-590 NHS Ester. | ATDBio                      |
| <b>Cell imaging</b>            |                                                |                                                                   |                             |
| <b>Name</b>                    | <b>Sequence 5'-3'</b>                          | <b>Modifications</b>                                              | <b>Supplier</b>             |
| Apt-1_ATTO590_2Fluoro-C        | C <sup>F</sup> GGUGUUG <sup>F</sup> CU_ATTO590 | “F” indicates Fluorination of the base.<br>3' ATTO-590 NHS Ester. | Integrated DNA Technologies |
| nApt-1_ATTO590_2Fluoro-G       | ATTO590_AG <sup>F</sup> CAACACCG <sup>F</sup>  | “F” indicates Fluorination of the base.<br>5' ATTO-590 NHS Ester. | Integrated DNA Technologies |
| <b>Biolayer interferometry</b> |                                                |                                                                   |                             |
| <b>Name</b>                    | <b>Sequence 5'-3'</b>                          | <b>Modifications</b>                                              | <b>Supplier</b>             |
| Apt-1_Biotin                   | CGGUGUUGCU-Biotin                              | 3' Biotinylation                                                  | Sigma Aldrich               |
| nApt-1_Biotin                  | Biotin-AGCAACACCG                              | 5' Biotinylation                                                  | Sigma Aldrich               |

**Supplementary Table S4: Aptamer sequences and modifications.** Different modifications were used for Apt-1 and nApt-1 depending on the experimental application.

#

1. Zacco, E. *et al.* Probing TDP-43 Condensation using an In Silico Designed Aptamer. *Zenodo* (2022)

doi:10.5281/zenodo.6533779.
